# Supplementary material
Source: publisher figshare collection journal article supplement (https://acs.figshare.com/ndownloader/files/4277084)
Supplement: Supplementary file 1 [file 4277084]

## Supporting Information for

# Hydrosilylation of Styrene on Water-saturated Si(001)– 2×1 at Room Temperature

*F. Bournel<sup>+</sup>, J.-J. Gallet<sup>+</sup>, D. Pierucci<sup>+</sup>, A. Khaliq<sup>+</sup>, F. Rochet<sup>+</sup>, A. Pietzsch<sup>\*</sup>*

<sup>+</sup> Laboratoire de Chimie Physique Matière et Rayonnement, UMR CNRS 7614, Université Pierre et Marie Curie, Paris 6, 11 rue Pierre et Marie Curie, 75231 Paris Cedex 05

<sup>\*</sup> MAX-Lab synchrotron, Lund university, P.O. box 118, 22100 Lund, Sweden

fabrice.bournel@upmc.fr

**Contents:** C 1s shake up spectrum and Si 2p spectrum of the clean Si(001)–2×1 surface exposed to 6.7 L of styrene at room temperature.

## **S1. Direct adsorption of styrene on clean Si(001)-2×1 at room temperature**

The clean surface preparation is described in the experimental section of the paper. After cleaning, the surface was exposed to a styrene dose of 6.7 L (900 s under a pressure of  $0.75 \times 10^{-8}$  Torr) at room temperature.

## **S.2 Wide C 1s spectrum of the styrene terminated Si(001)-2×1 surface**

The wide C 1s spectrum ( $h\nu = 390$  eV) of the styrene-terminated Si(001)-2×1 surface is presented in figure S1 after background subtraction. One observes shake up structures at lower kinetic energy than the main C 1s peak. The shake ups are fitted using two broad Gaussians at  $-6.1$  eV ( $FWHM = 3$  eV) and  $-9.2$  eV ( $FWHM = 4$  eV), representing 8% of the whole spectral intensity. Note that in gas phase benzene well resolved  $\pi \rightarrow \pi^*$  shake ups transition energies are observed at  $-5.9$  eV ( $^1(2b_1 \rightarrow 3b_1)$ ),  $-7.0$  eV ( $^1(1a_2 \rightarrow 2a_2)$ ),  $-8.3$  eV ( $^1(1b_1 \rightarrow 3b_1)$ ) and  $-10.7$  eV ( $^1(1b_1 \rightarrow 4b_1)$ ), amounting to 10% of the whole spectrum.<sup>1</sup> The  $\pi \rightarrow \pi^*$  transition energies in benzene match with the observed (broad) structures of styrene on Si(001), suggesting that the aromatic ring is intact after adsorption.

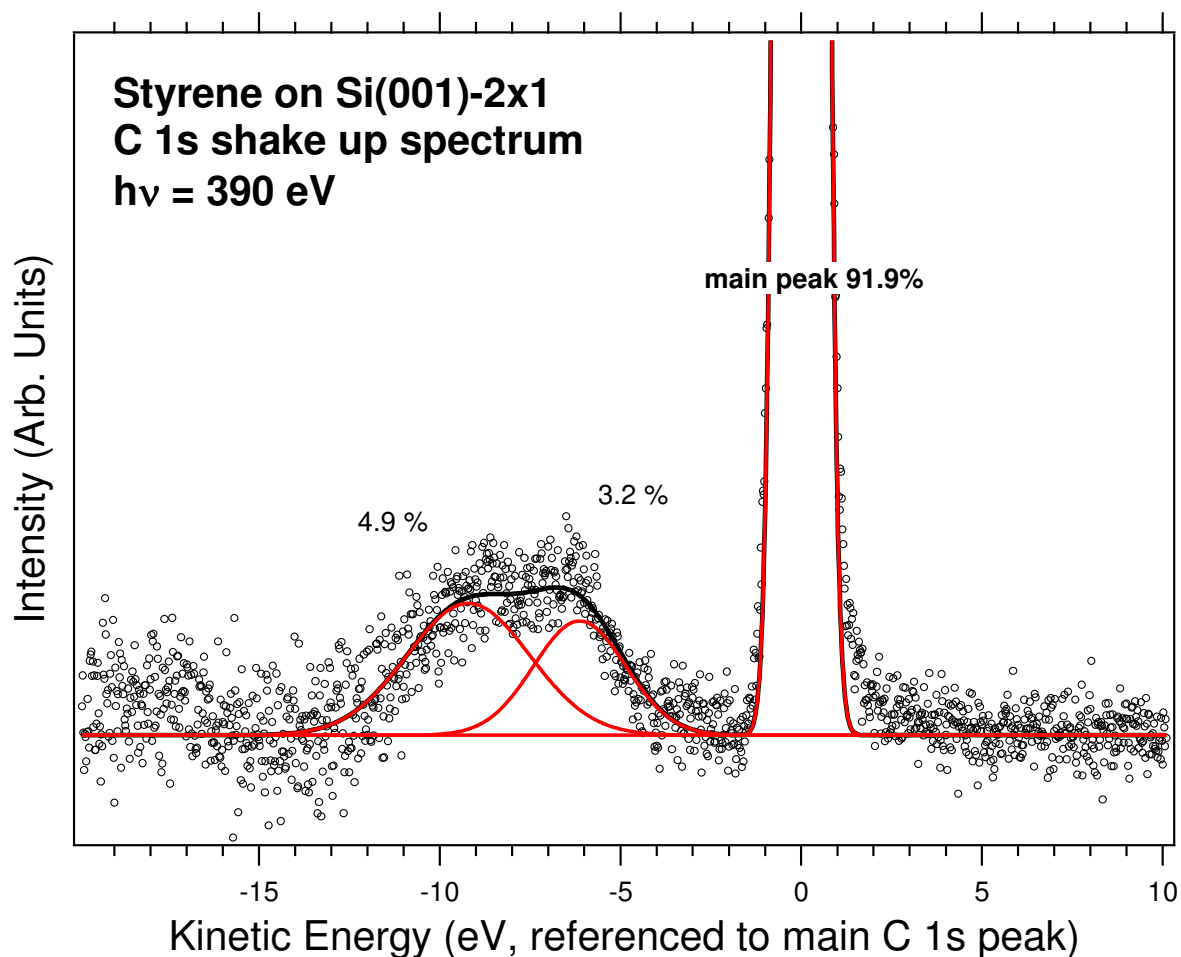

**Figure S1.** Wide XPS C 1s spectrum (dots) of the clean Si(001)-2 $\times$ 1 exposed to 6.7 L of styrene after subtraction of the background. The photon energy is 390 eV. The  $\pi \rightarrow \pi^*$  shake ups are fitted (black solid line) with two Gaussian components (red solid line), at -6.1 eV ( $FWHM = 3$  eV and -9.2 eV ( $FWHM = 4$  eV). The takeoff angle of the electrons, with respect to the surface normal, is 45°.

### S.3 Si 2p spectra of the clean and styrene-terminated Si(001)-2 $\times$ 1 surface

We present the Si 2p spectra ( $h\nu = 150$  eV) of the clean Si(001)-2 $\times$ 1 surface in figure S2. The surface directly exposed to 6.7 L of styrene is given in figure S2 (b). The attribution (and notation) of the various component is based on the work of Landmark and coworkers.<sup>2</sup> The fitting parameters are

collected in table S1. The spectrum of the clean surface (figure S2 (b)) is fitted with: a main peak labeled *B+SS* at 99.35 eV, encompassing both the bulk component *B* and the positively charged *down* silicon dimer atom *SS* (SCLS of +0.06 eV ); a peak labeled *S* at 98.78 eV (SCLS of −0.57 eV) related to the negatively charged *up* silicon dimer atom; a structure labeled *C* at 99.05 (SCLS of −0.3 eV from *B+SS*) ascribed to subsurface silicons (3<sup>rd</sup> layer); and finally the *S'* peak at 99.57 (SCLS of +0.22 eV) attributed to the silicon second plane.

After an exposure to 6.7 L of styrene (figure S2 (a)), the *S* component has completely vanished, indicating that the molecules reacts with the surface dimers. We see a component *S1* (SCLS of −0.3 eV, 3.95% of the spectral weight), that can be a remainder of the clean surface structure *C*. The formation of the SiC bond is manifested by the growth of structure *S2*, with an SCLS of +0.26 eV and a weight of 23.95% (*S2* may include the *S'* component of the clean surface). A small unidentified component at a SCLS of +1.2 eV is also seen and can be attributed to contamination (suboxides) or losses.

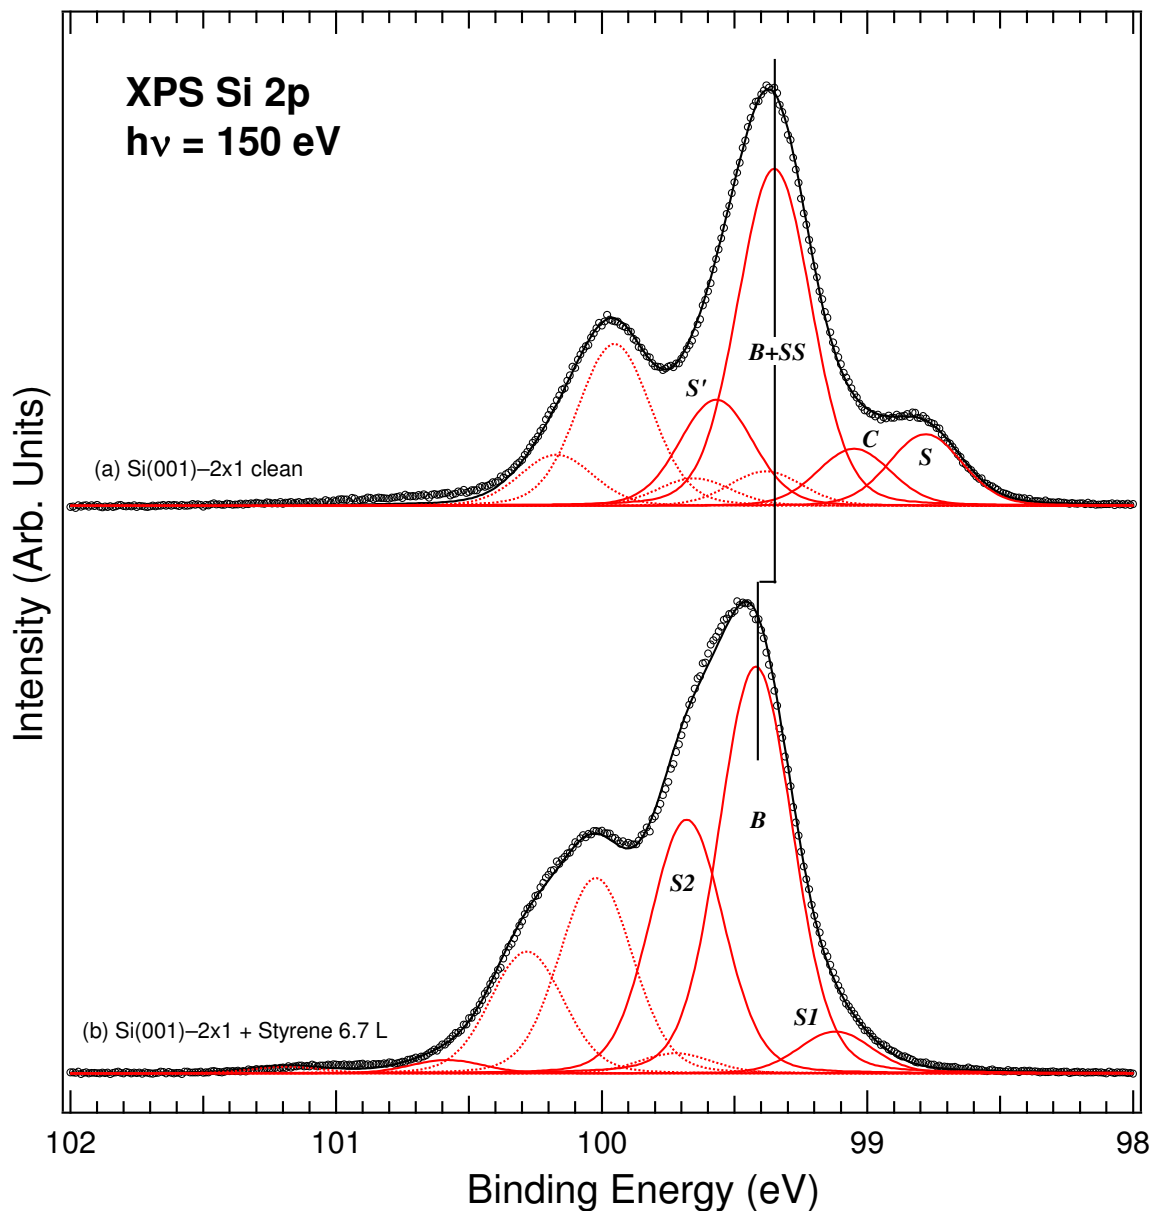

**Figure S2.** XPS Si 2p spectra ( $h\nu = 150 \text{ eV}$ ) of the  $n^+$ -doped  $\text{Si}(001)\text{-}2\times 1$  surface (a) clean and (b) after exposure to 6.7 L of styrene at room temperature. The takeoff angle of the electrons, with respect to the surface normal, is  $45^\circ$ . The experimental curves (circles) are fitted with sums of Voigt components (dark solid lines). The Si  $2p_{3/2}$  (Si  $2p_{1/2}$ ) fitting components are the red solid (red dotted) lines. The Si  $2p_{3/2}$  binding energy, the widths and the spectral weights of the various components are given in table S1. Note the small rigid binding energy shift of  $+0.07 \text{ eV}$ , due to a band bending variation.

| Surface                        | Component     | Si 2p <sub>3/2</sub><br>Binding<br>energy<br>(eV) | SCLS<br>(eV) | GW<br>(eV) | <i>FWHM</i><br>(eV) | Weight<br>(%) | Attribution                    |
|--------------------------------|---------------|---------------------------------------------------|--------------|------------|---------------------|---------------|--------------------------------|
| Clean                          | <i>S'</i>     | 99.57                                             | + 0.22       | 0.30       | 0.32                | 12.54         | 2 <sup>nd</sup> plane          |
|                                | <i>B(+SS)</i> | 99.35                                             | 0            | 0.30       | 0.32                | 39.85         | Bulk+ down atom                |
|                                | <i>C</i>      | 99.05                                             | −0.30        | 0.30       | 0.32                | 6.73          | Subsurface                     |
|                                | <i>S</i>      | 98.78                                             | −0.57        | 0.30       | 0.32                | 8.44          | Up atom                        |
| 6.7 L<br>Styrene on<br>Si(001) | <i>S3</i>     | 100.6                                             | + 1.2        | 0.30       | 0.32                | 1.27          | Losses                         |
|                                | <i>S2</i>     | 99.68                                             | +0.26        | 0.30       | 0.32                | 23.95         | Si□C and 2 <sup>nd</sup> plane |
|                                | <i>B</i>      | 99.42                                             | 0            | 0.30       | 0.32                | 38.40         | Bulk                           |
|                                | <i>SI</i>     | 99.12                                             | −0.30        | 0.30       | 0.32                | 3.95          | Subsurface (C)                 |

**Table S1.** Binding energies (Si 2p<sub>3/2</sub>), surface core level shifts (SCLS) referenced to the bulk component binding energy, Gaussian widths (GW), *FWHM* and spectral weights of the Voigt components used to fit the Si 2p experimental spectra shown in Figure S2. The Lorentzian width (LW) was 0.045 eV for all components.

## References

---

<sup>1</sup> Lunell, S. ; Svensson, S. ; Malmaqvist, P.A. ; Gelius, U. ; Basilier, E. ; Siegbahn, K. *Chem. Phys. Lett.* **1978**, 54, 420.

<sup>2</sup> Landemark, E.; Karlsson, C. J.; Chao, Y.-C.; Uhrberg, R. I. G. *Phys. Rev. Lett.* **1992**, 69, 1588.
